# Supplementary material for: Wildfire particulate matter in Shasta County, California and respiratory and circulatory disease-related emergency department visits and mortality, 2013–2018
Source: PubMed Central journal article supplement — Environ Epidemiol. 2020 Dec 21;5(1):e124. doi: 10.1097/EE9.0000000000000124 (PMC7939433; doi:10.1097/ee9.0000000000000124), 2020-12-21
Supplement: ee9-5-e124-s001.pdf [file ee9-5-e124-s001.pdf]

Appendix for “Wildfire particulate matter in Shasta County, California and respiratory and circulatory emergency department visits and mortality, 2013–2018”

**eTable 1: Valley and Mountain Zip Code Tabulation Areas.**

| <u>Mountain ZCTA codes</u>            |                            |            | <u>Valley ZCTA codes</u>               |                    |            |
|---------------------------------------|----------------------------|------------|----------------------------------------|--------------------|------------|
| Total population: 23,835 <sup>a</sup> |                            |            | Total population: 166,632 <sup>a</sup> |                    |            |
| ZCTA                                  | City                       | Population | ZCTA                                   | City               | Population |
| 96008                                 | Bella Vista                | 1,328      | 96001                                  | Redding            | 34,571     |
| 96011                                 | Big Bend PO Box            | 162        | 96002                                  | Redding            | 33,901     |
| 96013                                 | Burney                     | 4,810      | 96003                                  | Redding            | 44,475     |
| 96016                                 | Cassel                     | 375        | 96007                                  | Anderson           | 23,106     |
| 96017                                 | Castella                   | 152        | 96019                                  | Shasta Lake        | 10,111     |
| 96025                                 | Castle Crags               | 1,957      | 96022                                  | Cottonwood         | 16,442     |
| 96028                                 | Fall River Mills           | 1,359      | 96049                                  | Redding PO Box     | 87         |
| 96033                                 | French Gulch               | 500        | 96073                                  | Palo Cedro         | 3,939      |
| 96040                                 | Hat Creek                  | 178        | 96079                                  | Shasta Lake PO Box | -          |
| 96047                                 | Igo                        | 851        | 96089                                  | Shasta Lake PO Box | -          |
| 96051                                 | Lakehead                   | 1,351      | 96099                                  | Redding PO Box     | -          |
| 96056                                 | Mcarthur                   | 1,572      |                                        |                    |            |
| 96059                                 | North of Manton            | 599        |                                        |                    |            |
| 96062                                 | Milville                   | 1,007      |                                        |                    |            |
| 96065                                 | Montgomery Creek           | 359        |                                        |                    |            |
| 96069                                 | Oak Run                    | 828        |                                        |                    |            |
| 96070                                 | Obrien PO Box <sup>a</sup> | -          |                                        |                    |            |
| 96071                                 | Old Station                | 49         |                                        |                    |            |
| 96076                                 | Plantina                   | 200        |                                        |                    |            |
| 96084                                 | Round Mountain             | 458        |                                        |                    |            |
| 96087                                 | Shasta PO Box              | 589        |                                        |                    |            |
| 96088                                 | Shingletown                | 4,419      |                                        |                    |            |
| 96095                                 | Whiskeytown PO Box         | 1,328      |                                        |                    |            |
| 96096                                 | Whitmore                   | 732        |                                        |                    |            |
| 960XX                                 |                            | -          |                                        |                    |            |

ZCTA, Zip Code Tabulation Area

<sup>a</sup> Total population from the 2014-2018 American Community Survey

## **eMethods 1: Approach to estimate wildfire-specific PM<sub>2.5</sub>**

We first modelled daily total PM<sub>2.5</sub> mass concentrations at the ZIP code-level for the area and study period of interest as described elsewhere.<sup>1</sup> We then used a 4-stage approach to estimate PM<sub>2.5</sub> attributable to wildfires smoke as described in Aguilera et al.<sup>2</sup>:

Step 1: Identify ZIP code days exposed to smoke plumes intersecting each NOAA Hazard Mapping Systems (HMS) smoke plume with ZIP code polygons (if intersected, smoke exposed zip code day = 1)

Step 2: Replace smoke-exposed ZIP code day = 1 by missing

Step 3: Impute non-smoke PM<sub>2.5</sub> for exposed ZIP code-days using cubic spline interpolation. We only imputed non-smoke PM<sub>2.5</sub> for ZIP code-days where PM<sub>2.5</sub> data was originally available, i.e., we did not impute missing values in the original dataset. Cubic spline interpolation was implemented by means of the imputeTS R package. This step provided estimates of ambient PM<sub>2.5</sub> unrelated to wildfire smoke.

Step 4: Subtract imputed non-smoke PM<sub>2.5</sub> from the original PM<sub>2.5</sub> data to obtain ZIP code daily PM<sub>2.5</sub> attributable to smoke.

We used available smoke plume datasets from NOAA's HMS (to identify ZIP code days exposed to wildfire smoke). HMS uses visible satellite imagery and trained satellite analyst skills to estimate the spatial extent of smoke, though it cannot discern whether a given plume is at ground level (where PM<sub>2.5</sub> samples are taken for monitoring) or higher in the atmosphere. The HMS smoke products represent the spatial extent of daily smoke plumes.<sup>1</sup> A simple smoke binary variable was created by intersecting ZIP code polygons with smoke polygons, which was then used as an indication of daily exposure to wildfire smoke PM<sub>2.5</sub>. In other words, a value of 1 was assigned to a ZIP code on a given day if its boundaries were within a smoke plume polygon from the HMS dataset.

Finally, we aggregated wildfire PM<sub>2.5</sub> and non-wildfire PM<sub>2.5</sub> concentrations from the ZIP code daily to (1) county-wide weekly and (2) valley ZCTA and mountain ZCTA weekly level for statistical analyses.

**eTable 2:** Estimated coefficients and 95% confidence intervals for time-series models estimating the association between weekly wildfire PM<sub>2.5</sub> and the Carr Fire and weekly pulmonary and circulatory emergency department visits and death among residents of valley Zip Code Tabulation Areas in Shasta County, California, 2013–2018 (n = 314 weeks).<sup>a</sup>

| <b>Outcome</b>                                                                         | <b>% change (95% CI)</b>  |
|----------------------------------------------------------------------------------------|---------------------------|
| <b>Respiratory disease-related ED visits<sup>b</sup></b>                               |                           |
| <b>Wildfire PM<sub>2.5</sub> binary (<math>\geq 5.5 \mu\text{g}/\text{m}^3</math>)</b> |                           |
| Same week                                                                              | 14.6 (4.2, 24.9)          |
| Lag 1 week                                                                             | 1.7 (-8.3, 11.6)          |
| Lag 2 week                                                                             | 6.5 (-3.6, 16.6)          |
| <b>Carr Fire<sup>c</sup></b>                                                           | <b>27.0 (4.0, 50.0)</b>   |
| <b>Circulatory disease-related ED visits<sup>d</sup></b>                               |                           |
| <b>Wildfire PM<sub>2.5</sub> binary (<math>\geq 5.5 \mu\text{g}/\text{m}^3</math>)</b> |                           |
| Same week                                                                              | 2.3 (-9.0, 13.6)          |
| Lag 1 week                                                                             | 3.1 (-8.5, 14.8)          |
| Lag 2 week                                                                             | -8.1 (-19.3, 3.1)         |
| <b>Carr Fire</b>                                                                       | <b>1.1 (-14.5, 16.7)</b>  |
| <b>All-cause deaths<sup>d</sup></b>                                                    |                           |
| <b>Wildfire PM<sub>2.5</sub> binary (<math>\geq 5.5 \mu\text{g}/\text{m}^3</math>)</b> |                           |
| Same week                                                                              | 8.1 (-2.0, 18.2)          |
| Lag 1 week                                                                             | -5.0 (-15.6, 5.6)         |
| Lag 2 week                                                                             | -1.1 (-11.0, 8.8)         |
| <b>Carr Fire</b>                                                                       | <b>-5.4 (-17.7, 6.9)</b>  |
| <b>Respiratory disease-related deaths<sup>e</sup></b>                                  |                           |
| <b>Wildfire PM<sub>2.5</sub> binary (<math>\geq 5.5 \mu\text{g}/\text{m}^3</math>)</b> |                           |
| Same week                                                                              | 8.2 (-25.3, 41.6)         |
| Lag 1 week                                                                             | 5.9 (-29.4, 41.1)         |
| Lag 2 week                                                                             | -31.5 (-64.4, 1.5)        |
| <b>Carr Fire</b>                                                                       | <b>4.6 (-31.9, 41.1)</b>  |
| <b>Circulatory disease-related deaths<sup>e</sup></b>                                  |                           |
| <b>Wildfire PM<sub>2.5</sub> binary (<math>\geq 5.5 \mu\text{g}/\text{m}^3</math>)</b> |                           |
| Same week                                                                              | -10.2 (-27.4, 7.1)        |
| Lag 1 week                                                                             | -9.8 (-27.9, 8.4)         |
| Lag 2 week                                                                             | 9.8 (-7.2, 26.8)          |
| <b>Carr Fire<sup>c</sup></b>                                                           | <b>-18.2 (-39.4, 2.9)</b> |

<sup>a</sup> The Shasta County Health and Human Services Agency acquired mortality data from the California Integrated Vital Records System and emergency department data from the California Office of Statewide Health Planning and Development.

<sup>b</sup> Respiratory ED visits exhibited AR1 and AR2 as well as seasonal AR51 and AR52 autocorrelation.

<sup>c</sup> The Carr Fire (229,651 acres) ignited on July 23, 2018 and was contained on August 30, 2018, however, high wildfire PM<sub>2.5</sub> days persisted until the second week of September and we included the weeks between July 23, 2018 to September 9, 2018 in the binary Carr Fire exposure variable. Additionally, though smaller in size, the Hirz Fire (46,150 acres burned) and the Delta Fire (63,311 acres) also burned during this time, contributing to smoke in Shasta County.<sup>3</sup>

<sup>d</sup> Circulatory ED visits and all-cause deaths exhibited MA1 and AR1 autocorrelation.

<sup>e</sup> Respiratory and circulatory disease-related deaths exhibited no autocorrelation.

**eFigure 1:** Location and categories of Zip Code Tabulation Areas in Shasta County, California along with the 2018 Carr Fire boundary.

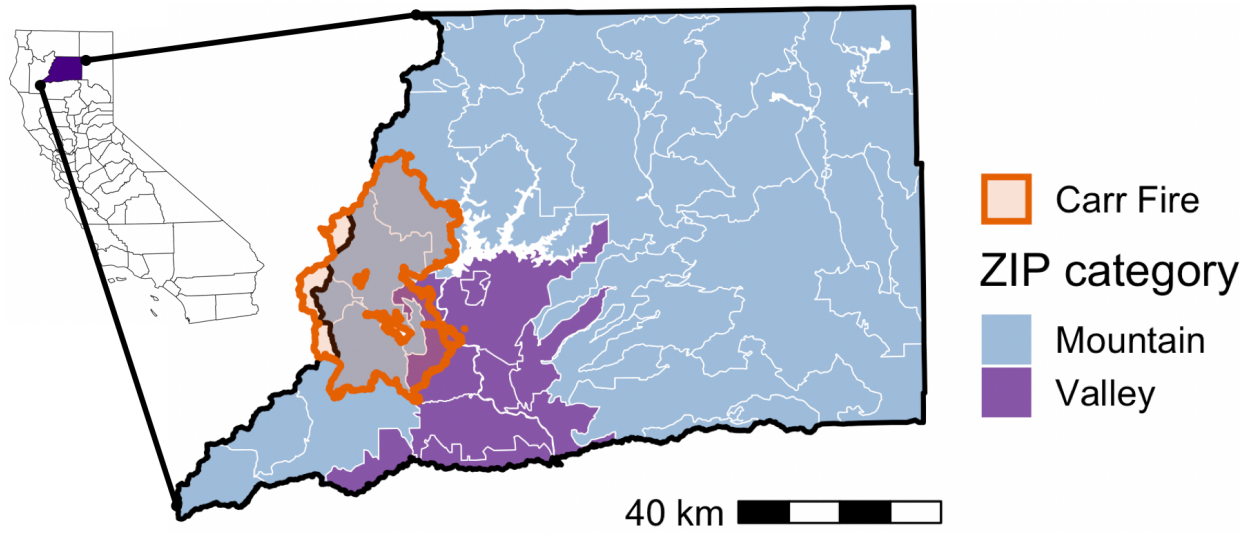

**eFigure 2:** Weekly average wildfire PM<sub>2.5</sub> concentration at the ZCTA-level during the 2018 Carr Fire in Shasta County, California valley ZCTAs.

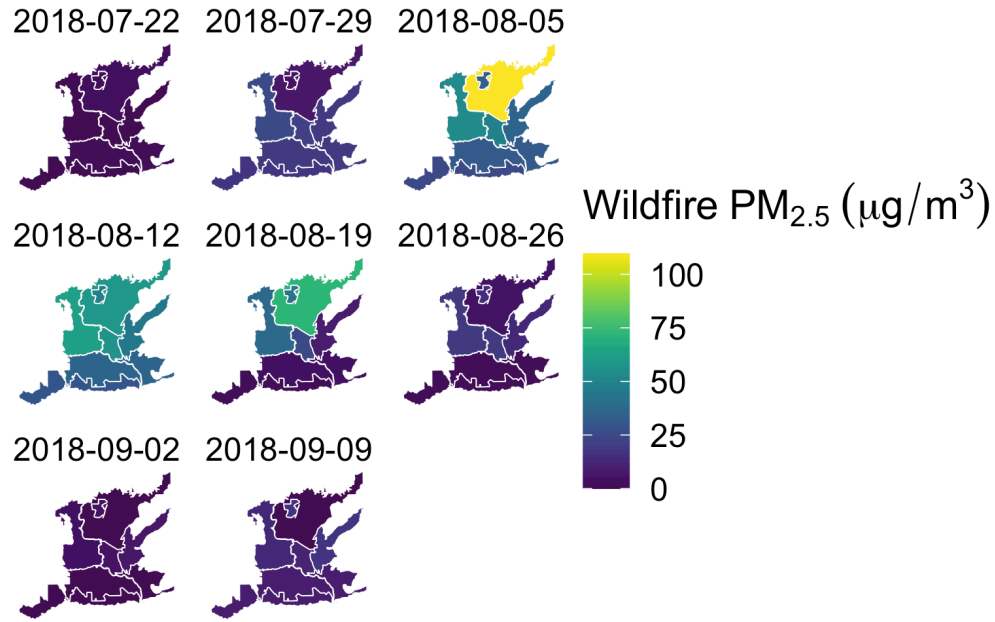

## REFERNECES

1. Aguilera R, Gershunov A, Ilango SD, Guzman-Morales J, Benmarhnia T. Santa Ana winds of Southern California impact PM2.5 with and without smoke from wildfires. *GeoHealth*. 2020;4(1).
2. Aguilera R CT, Gershunov A, Benmarhnia T. Wildfire smoke impacts respiratory health more than fine particles from other sources: observational evidence from Southern California. *Nature Comm [In Press]*. 2020.
3. The California Department of Forestry and Fire Protection. Cal Fire Incident Information. <https://www.fire.ca.gov/>. Published 2020. Accessed 16 June 2020.
